# Supplementary material for: Improving alkane dehydrogenation activity on γ-Al2O3 through Ga doping
Source: Royal Society of Chemistry journal article supplement (doi:10.1039/d0cy01474e), 2020-01-01
Supplement: d0cy01474e1.pdf [file d0cy01474e1.pdf]

## **Supporting information**

**for**

# **Improving Alkane Dehydrogenation Activity on $\gamma$ - $\text{Al}_2\text{O}_3$ through Ga Doping**

Mona Abdelgaid, James Dean and Giannis Mpourmpakis

Department of Chemical Engineering, University of Pittsburgh, Pittsburgh, PA 15261, USA

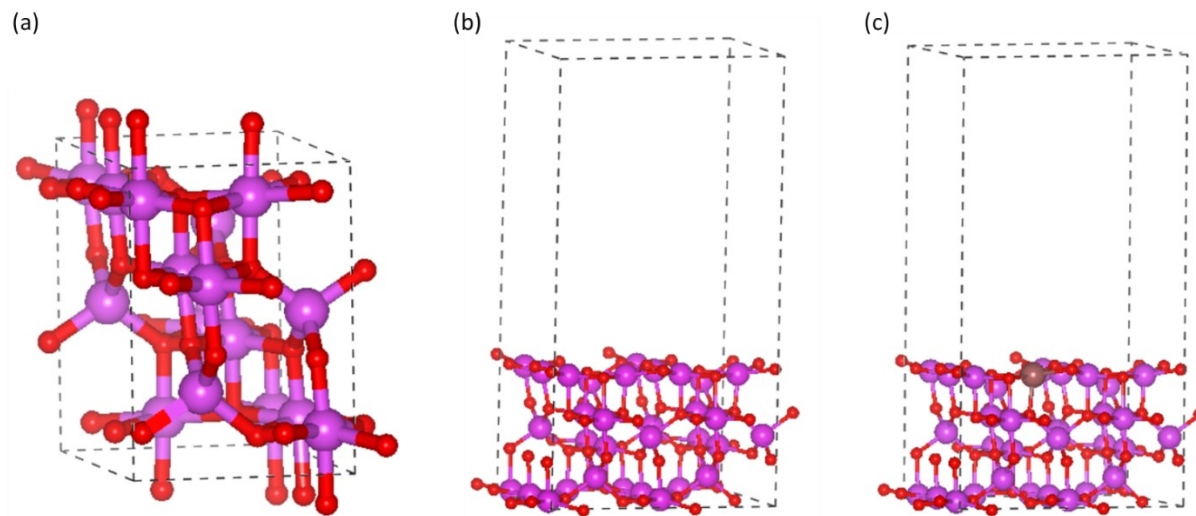

**F**

**figure S1.** Structures of  $\gamma$ - $\text{Al}_2\text{O}_3$  (a) unit cell (b) super cell of  $1 \times 2$  primitive cells of undoped (100)  $\gamma$ - $\text{Al}_2\text{O}_3$  (c) super cell of  $1 \times 2$  primitive cells of  $\text{Ga}^{\text{Va}}$ -doped (100)  $\gamma$ - $\text{Al}_2\text{O}_3$ . O, Al, and Ga atoms are shown in red, purple, and brown, respectively.

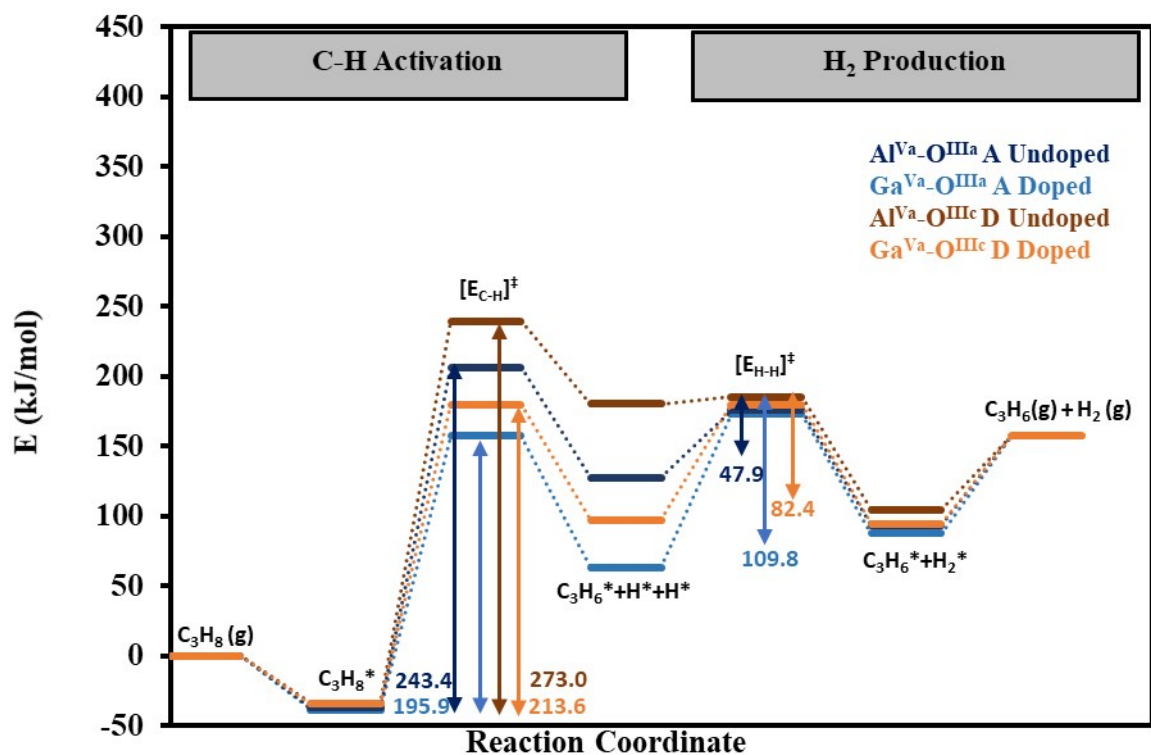

**Figure S2.** Reaction energy profile of propane dehydrogenation (PDH) on Ga<sup>Va</sup>-doped and undoped (100)  $\gamma$ -Al<sub>2</sub>O<sub>3</sub> via the concerted mechanism at the corresponding Lewis acid-base site pairs.  $E_{C-H}^\ddagger$  is the electronic energy of the transition state (TS) for C-H activation, whereas  $E_{H-H}^\ddagger$  is the electronic energy of the TS for hydrogen production. Adsorbed states are denoted with asterisks.

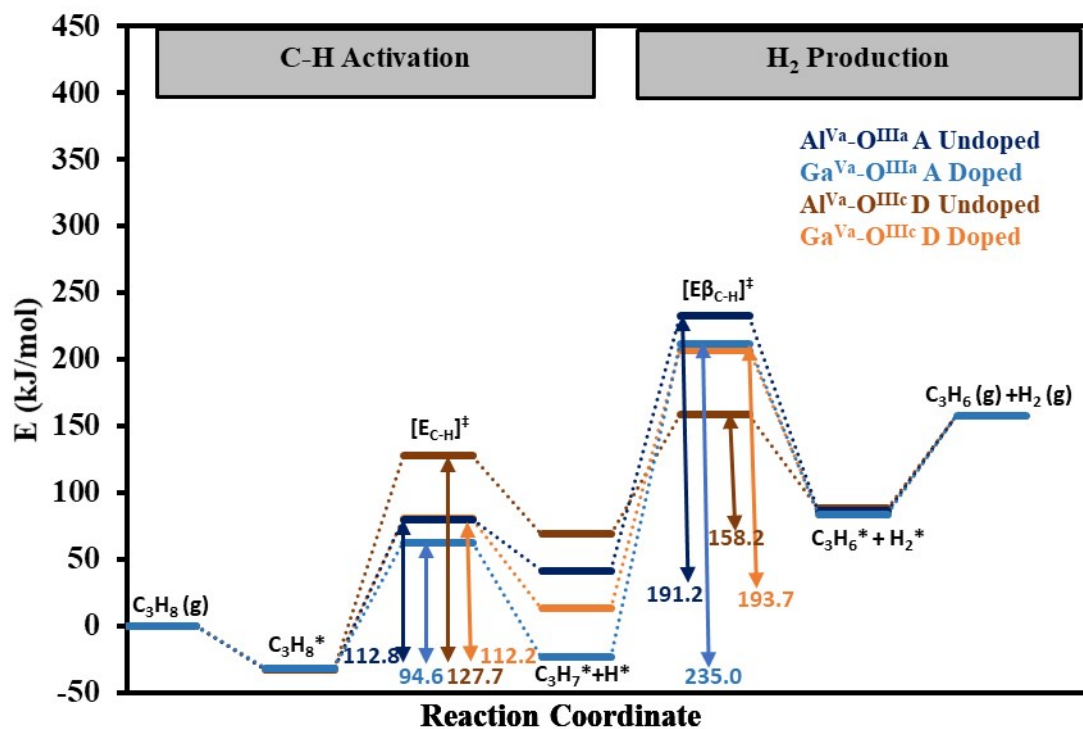

**Figure S3.** Reaction energy profile of propane dehydrogenation (PDH) on Ga<sup>Va</sup>-doped and undoped (100)  $\gamma$ -Al<sub>2</sub>O<sub>3</sub> via the stepwise mechanism at the corresponding Lewis acid-base site pairs.  $E_{C-H}^\ddagger$  is the electronic energy of the TS for C-H activation, whereas  $E_{\beta C-H}^\ddagger$  is the electronic energy of the TS for hydrogen production. Adsorbed states are denoted with asterisks.

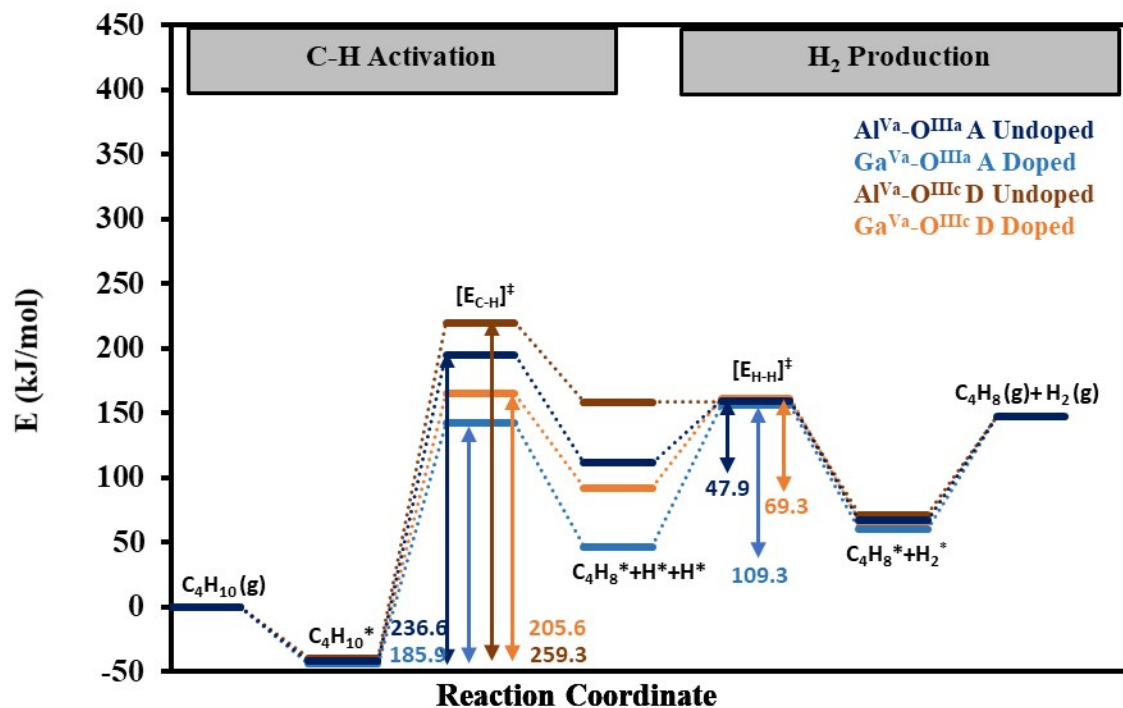

**Figure S4.** Reaction energy profile of isobutane dehydrogenation (i-BDH) on Ga<sup>Va</sup>-doped and undoped (100)  $\gamma$ -Al<sub>2</sub>O<sub>3</sub> via the concerted mechanism at the corresponding Lewis acid-base site pairs.  $E_{C-H}^{\ddagger}$  is the electronic energy of the TS for C-H activation, whereas  $E_{H-H}^{\ddagger}$  is the electronic energy of the TS for hydrogen production. Adsorbed states are denoted with asterisks.

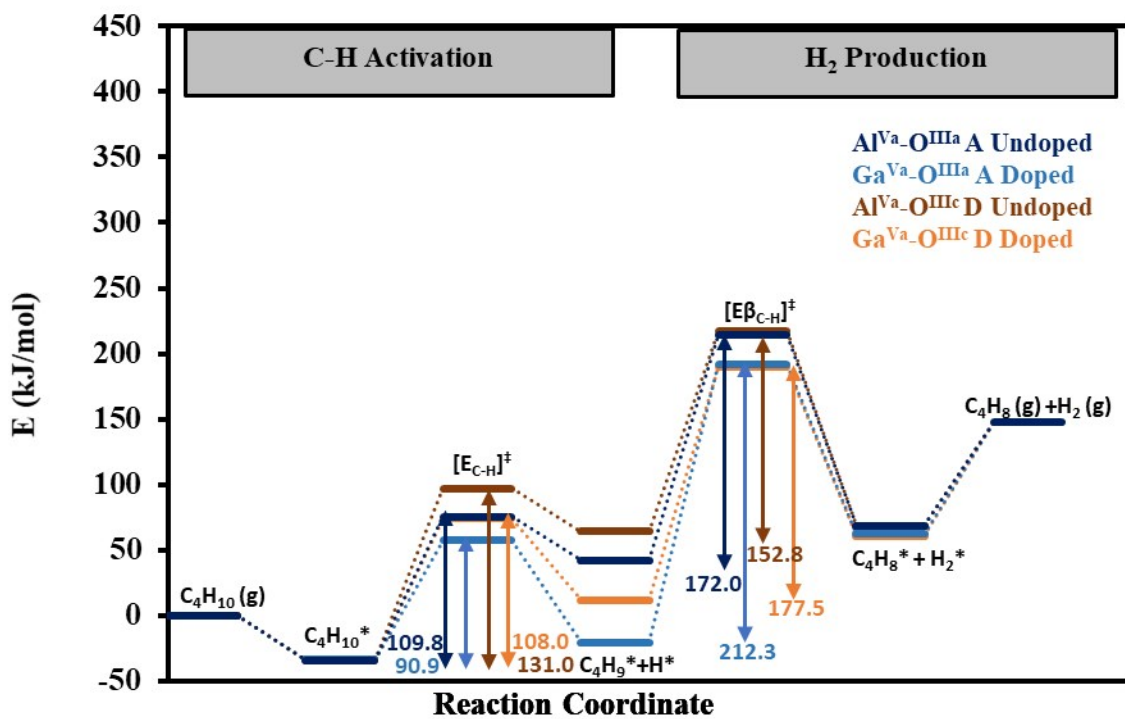

**Figure S5.** Reaction energy profile of isobutane dehydrogenation (i-BDH) on Ga<sup>Va</sup>-doped and undoped (100)  $\gamma$ -Al<sub>2</sub>O<sub>3</sub> via the stepwise mechanism at the corresponding Lewis acid-base site pairs.  $E_{C-H}^\ddagger$  is the electronic energy of the TS for C-H activation, whereas  $E_{\beta-C-H}^\ddagger$  is the electronic energy of the TS for hydrogen production. Adsorbed states are denoted with asterisks.

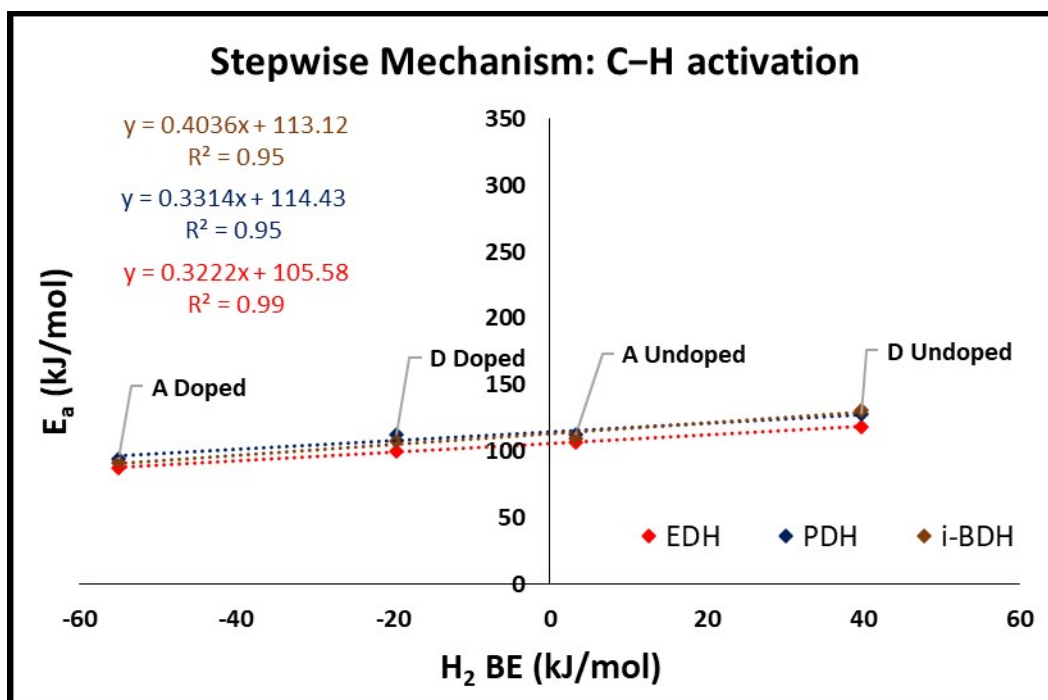

**Figure S6.** C-H activation barriers for the stepwise mechanism on  $Ga^{Va}$ -doped and undoped (100)  $\gamma$ - $Al_2O_3$  vs.  $H_2$  BE on the corresponding Lewis acid-base site pairs. Red, blue, and brown diamonds correspond to ethane – EDH, propane – PDH, and isobutane – i-BDH dehydrogenation, respectively.

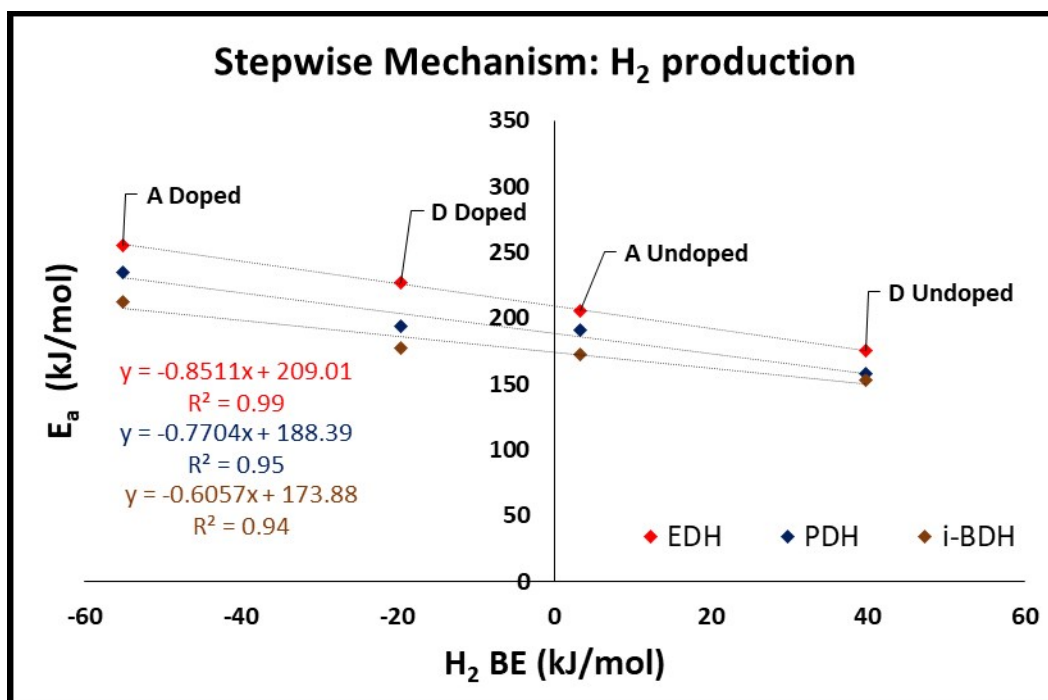

**Figure S7.** H<sub>2</sub> production barriers for the stepwise mechanism on (100) Ga<sup>Va</sup>-doped and undoped  $\gamma$ -Al<sub>2</sub>O<sub>3</sub> vs. H<sub>2</sub> BE on the corresponding Lewis acid-base site pairs. Red, blue, and brown diamonds correspond to ethane – EDH, propane – PDH, and isobutane – i-BDH dehydrogenation, respectively.



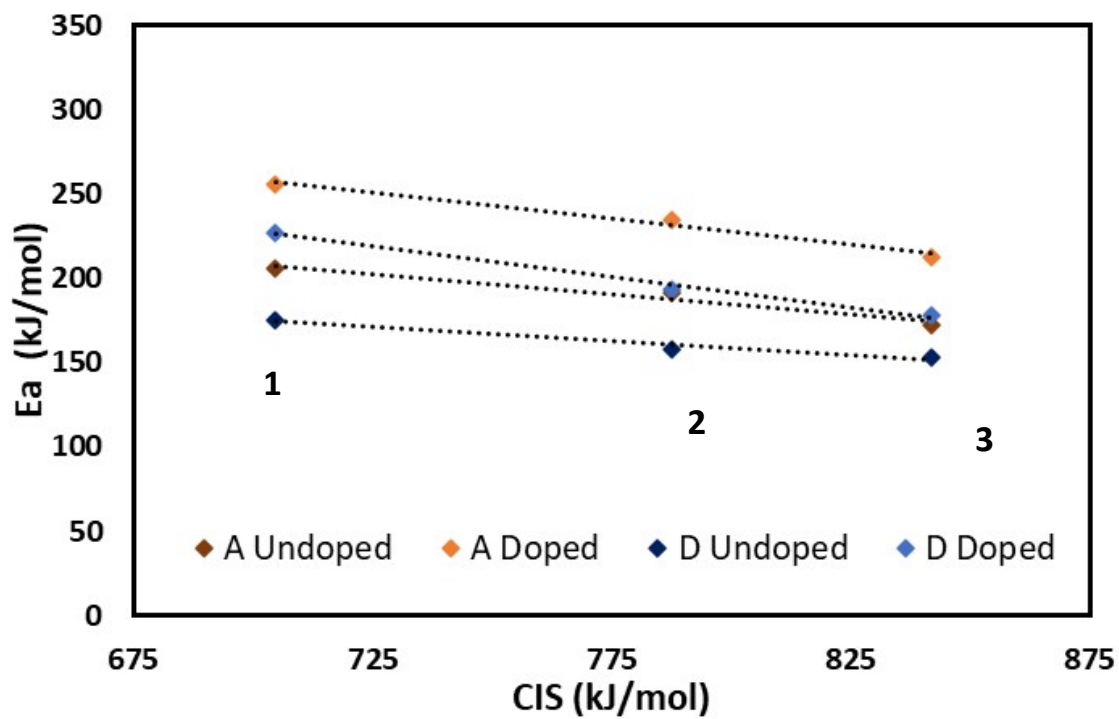

**Figure S8.** DFT-calculated  $H_2$  production barriers vs. CIS for the stepwise mechanism at the respective acid-base site pairs. Data points corresponding to primary, secondary, and tertiary carbocation intermediates are denoted with numerical insets (primary: 1, secondary: 2, tertiary: 3).

**Table S1.** Alkane dehydrogenation model parameters and standard error associated with data regression for the concerted mechanism. Fitted values resulted in a  $R^2$  value of 0.9807

|                   | Parameter | Std Error |
|-------------------|-----------|-----------|
| Intercept         | 375.9     | 20.28     |
| H <sub>2</sub> BE | 0.861     | 0.042     |
| CIS               | -0.175    | 0.026     |

**Table S2.** Alkane dehydrogenation model parameters and standard error associated with data regression for the stepwise mechanism. Fitted values resulted in a  $R^2$  value of 0.9639

|                   | Parameter | Std Error |
|-------------------|-----------|-----------|
| Intercept         | 400.105   | 26.55     |
| H <sub>2</sub> BE | -0.7424   | 0.055     |
| CIS               | -0.2695   | 0.034     |

**Table S3.** Values of turnover frequency (TOF)-determining transition state (TDTS) and TOF-determining intermediate (TDI) of ethane dehydrogenation (EDH), propane dehydrogenation (PDH), and isobutane dehydrogenation (i-BDH) on different site pairs of  $\gamma$ -Al<sub>2</sub>O<sub>3</sub>.

| ADH reaction | Site pair | TDI (kJ mol <sup>-1</sup> ) |          | TSTS (kJ mol <sup>-1</sup> ) |          |
|--------------|-----------|-----------------------------|----------|------------------------------|----------|
|              |           | Concerted                   | Stepwise | Concerted                    | Stepwise |
| EDH          | A Undoped | -27.57                      | -27.47   | 227.27                       | 250.82   |
|              | A Doped   | -27.59                      | -26.20   | 178.35                       | 235.73   |
|              | D Undoped | -27.79                      | -28.37   | 264.30                       | 249.69   |
|              | D Doped   | -29.54                      | -26.66   | 200.70                       | 236.42   |
| PDH          | A Undoped | -36.73                      | -32.82   | 206.42                       | 232.38   |
|              | A Doped   | -38.42                      | -31.89   | 155.45                       | 211.40   |
|              | D Undoped | -33.50                      | -32.52   | 239.50                       | 227.00   |
|              | D Doped   | -34.03                      | -32.00   | 179.60                       | 206.84   |
| i-BDH        | A Undoped | -41.80                      | -34.32   | 194.81                       | 214.33   |
|              | A Doped   | -43.90                      | -33.63   | 142.0                        | 191.67   |
|              | D Undoped | -39.50                      | -33.96   | 219.80                       | 216.90   |
|              | D Doped   | -40.80                      | -33.92   | 164.70                       | 189.45   |
